# Supplementary material for: Associations Between Household Chaos and Appetitive Traits in Preschoolers and Preadolescents
Source: Research Square preprint supplement (doi:10.21203/rs.3.rs-6567466/v1), 2025-12-16
Supplement: Supplementary file 1 [file 7b7ab4f8fcdcaeb5310f8f4d.pdf]

## *Supplementary Material*

### **Associations Between Household Chaos and Appetitive Traits in Preschoolers and Preadolescents**

**Authors:** Zhuoya Zhang<sup>a</sup>, Delaina Carlson<sup>a,b</sup>, Caroline Borowy<sup>a</sup>, Mingliang Ge<sup>a</sup>, Diane Gilbert-Diamond<sup>a,c,d</sup>, Jennifer A. Emond<sup>c,e</sup>

**Affiliations:**

<sup>a</sup>Department of Epidemiology, Geisel School of Medicine, Dartmouth College, NH 03755, USA

<sup>b</sup>Department of Human Development and Family Sciences, University of Connecticut, CT 06269, USA

<sup>c</sup>Department of Pediatrics, Geisel School of Medicine at Dartmouth College, NH 03756, USA

<sup>d</sup>Department of Medicine, Geisel School of Medicine at Dartmouth College, NH, 03756, USA

<sup>e</sup>Department of Biomedical Data Science, Geisel School of Medicine at Dartmouth College, NH, 03756, USA

**Keywords:** household chaos, appetitive trait, childhood obesity, hedonic eating, preschooler, preadolescent, middle childhood, eating behavior, eating in the absence of hunger.

**Corresponding Author**

Zhuoya Zhang

Dartmouth College

1 Rope Ferry Road, Suite 112

Hanover, NH, USA, 03755

Email: zhuoya.zhang.gr@dartmouth.edu

**Figure S1.** Hypothesized relationship between household chaos (exposure variable), child appetitive traits (outcome variables), and covariates (child, parent, and household characteristics).

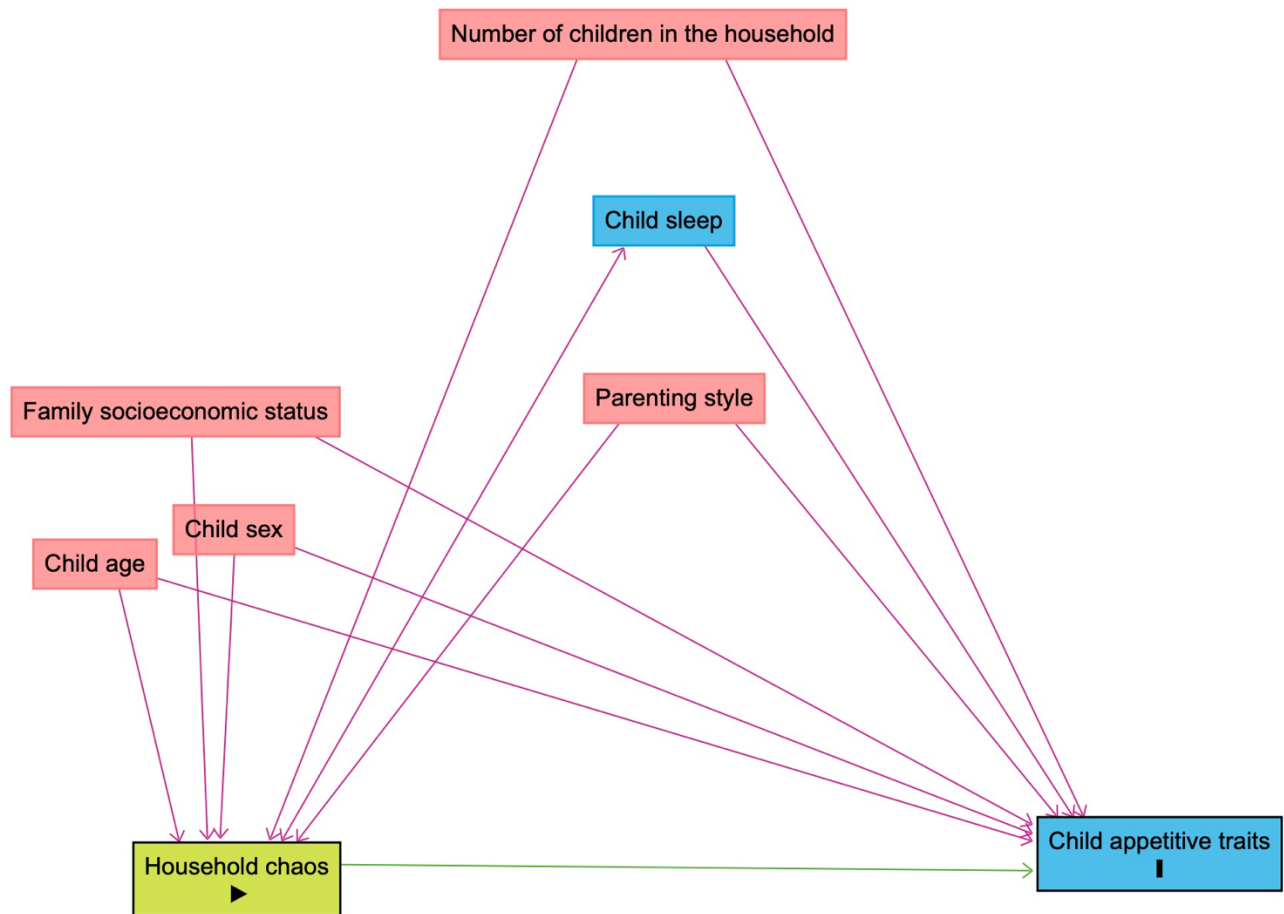

**Table S1.** Participant baseline characteristics between the baseline and follow-up samples, presented as mean  $\pm$  SD or N (%).

|                                                  | Study A: Preschoolers        |                                         |       | Study B: Preadolescents      |                                        |       |
|--------------------------------------------------|------------------------------|-----------------------------------------|-------|------------------------------|----------------------------------------|-------|
|                                                  | <i>Baseline participants</i> | <i>Six-month follow-up participants</i> |       | <i>Baseline participants</i> | <i>One-year follow-up participants</i> |       |
|                                                  | N = 92                       | N = 80                                  | $p^c$ | N = 184                      | N = 95                                 | $p^c$ |
| Child age (years)                                | 4.2 $\pm$ 1.0                | 4.2 $\pm$ 1.0                           | 0.89  | 10.9 $\pm$ 1.2               | 10.9 $\pm$ 1.2                         | 0.99  |
| Female                                           | 40 (44%)                     | 37 (46%)                                | 0.83  | 77 (42%)                     | 36 (38%)                               | 0.74  |
| White non-Hispanic                               | 81 (88%)                     | 70 (88%)                                | 0.99  | 166 (90%)                    | 90 (95%)                               | 0.28  |
| Household income (\$) <sup>a</sup>               |                              |                                         | 0.97  |                              |                                        | 0.76  |
| <65000                                           | 26 (28%)                     | 20 (25%)                                |       | 24 (13%)                     | 9 (10%)                                |       |
| 65000-145000                                     | 47 (51%)                     | 43 (54%)                                |       | 99 (54%)                     | 51 (54%)                               |       |
| 145000-225000                                    | 13 (14%)                     | 12 (15%)                                |       | 43 (23%)                     | 23 (24%)                               |       |
| >225000                                          | 6 (7%)                       | 5 (6%)                                  |       | 18 (10%)                     | 12 (13%)                               |       |
| Number of children in the household <sup>b</sup> |                              |                                         | 0.99  |                              |                                        | -     |
| 1                                                | 16 (17.4%)                   | 14 (17.5%)                              |       | -                            | -                                      |       |
| 2                                                | 46 (50.0%)                   | 39 (48.8%)                              |       | -                            | -                                      |       |
| 3                                                | 15 (16.3%)                   | 13 (16.3%)                              |       | -                            | -                                      |       |
| 4 or more                                        | 15 (16.3%)                   | 14 (17.5%)                              |       | -                            | -                                      |       |

*Footnotes:*

<sup>a</sup>Household income was missing for 4 participants in Study A and was imputed with the sample mode.

<sup>b</sup>The number of children in the household was only collected in Study A.

<sup>c</sup> $P$ -values are computed with Welch's two-sample t-test or Pearson's Chi-squared tests.

**Table S2.** Internal consistency of the questionnaires used in the study.

| Instrument                                   | Subscale                | Number of Items | Study A: Preschoolers (N = 92) | Study B: Preadolescents (N = 184) |
|----------------------------------------------|-------------------------|-----------------|--------------------------------|-----------------------------------|
|                                              |                         |                 | Cronbach's $\alpha$            | Cronbach's $\alpha$               |
| Child Eating Behavior Questionnaire          | Food responsiveness     | 5               | 0.77                           | 0.83                              |
|                                              | Emotional overeating    | 4               | 0.80                           | 0.82                              |
|                                              | Enjoyment of food       | 4               | 0.91                           | 0.82                              |
|                                              | Satiety responsiveness  | 5               | 0.82                           | 0.80                              |
|                                              | Emotional undereating   | 4               | 0.69                           | 0.77                              |
| Confusion, Hubbub, and Order Scale           | Overall                 | 15              | 0.85                           | 0.87                              |
| Parenting Style and Dimensions Questionnaire | Authoritative parenting | 15              | 0.85                           | NA                                |
|                                              | Permissive parenting    | 5               | 0.68                           | NA                                |
| Authoritative Parenting Index                | Demandingness           | 4               | NA                             | 0.52                              |
|                                              | Responsiveness          | 5               | NA                             | 0.75                              |

**Table S3.** Distribution of household chaos by participant baseline demographics in preschoolers (Study A, N = 92).

|                                                   |          | <b>CHAOS score<sup>a</sup></b> |           |                      |
|---------------------------------------------------|----------|--------------------------------|-----------|----------------------|
|                                                   | <b>N</b> | <b>Mean</b>                    | <b>SD</b> | <b>p<sup>b</sup></b> |
| <b>Child age</b>                                  |          |                                |           |                      |
| ≥3 and <4                                         | 28       | 28.71                          | 6.90      | 0.72                 |
| ≥4 and <5                                         | 27       | 29.78                          | 6.27      |                      |
| ≥5 and <6                                         | 28       | 25.71                          | 6.56      |                      |
| ≥6 and <7                                         | 9        | 29.78                          | 5.49      |                      |
| <b>Child sex</b>                                  |          |                                |           |                      |
| Female                                            | 40       | 27.93                          | 5.65      | 0.95                 |
| Male                                              | 52       | 28.44                          | 7.32      |                      |
| <b>Child race/ethnicity</b>                       |          |                                |           |                      |
| White, non-Hispanic                               | 81       | 28.16                          | 6.43      | 0.95                 |
| Other                                             | 11       | 28.64                          | 8.19      |                      |
| <b>Annual household income (\$)</b>               |          |                                |           |                      |
| <65,000                                           | 26       | 29.15                          | 7.75      | 0.45                 |
| 65,000-145,000                                    | 47       | 28.15                          | 6.26      |                      |
| 145,000-225,000                                   | 13       | 27.69                          | 6.94      |                      |
| >225,000                                          | 6        | 25.83                          | 2.64      |                      |
| <b>Number of children living in the household</b> |          |                                |           |                      |
| 1                                                 | 16       | 22.50                          | 3.35      | <0.0001              |
| 2                                                 | 46       | 27.61                          | 5.19      |                      |
| 3                                                 | 15       | 30.53                          | 6.22      |                      |
| 4 or more                                         | 15       | 33.87                          | 8.27      |                      |

*Footnotes:*<sup>a</sup>CHAOS, Confusion, Hubbub, and Order Scale (range: 15-60).<sup>b</sup>P-values were computed via the Spearman correlation test for continuous variables (i.e., child age), the Wilcoxon rank sum test with continuity correction for categorical variables with two levels (i.e., child sex and race/ethnicity), or the Jonckheere-Terpstra test for trend for ordinal variables with more than two levels (i.e., annual income and number of children in the household).

**Table S4.** Distribution of household chaos by participant baseline demographics in preadolescents (Study B, N = 184).

|                                     |          | <b>CHAOS score<sup>a</sup></b> |           |                      |
|-------------------------------------|----------|--------------------------------|-----------|----------------------|
|                                     | <b>N</b> | <b>Mean</b>                    | <b>SD</b> | <b>p<sup>b</sup></b> |
| <b>Child age</b>                    |          |                                |           |                      |
| ≥ 8 and <9                          | 2        | 27.00                          | 4.24      | 0.81                 |
| ≥ 9 and <10                         | 55       | 27.71                          | 5.80      |                      |
| ≥ 10 and <11                        | 34       | 29.38                          | 6.46      |                      |
| ≥ 11 and <12                        | 57       | 28.40                          | 8.24      |                      |
| ≥ 12 and <13                        | 36       | 28.97                          | 7.73      |                      |
| <b>Child sex</b>                    |          |                                |           |                      |
| Female                              | 77       | 28.22                          | 7.65      | 0.58                 |
| Male                                | 106      | 28.71                          | 6.69      |                      |
| NA                                  | 1        | 23                             | NA        |                      |
| <b>Child race/ethnicity</b>         |          |                                |           | 0.37                 |
| White, non-Hispanic                 | 166      | 28.27                          | 7.02      |                      |
| Other                               | 18       | 30.33                          | 7.57      |                      |
| <b>Annual household income (\$)</b> |          |                                |           |                      |
| <65,000                             | 24       | 30.29                          | 8.31      | 0.003                |
| 65,000-145,000                      | 99       | 29.10                          | 6.47      |                      |
| 145,000-225,000                     | 43       | 27.16                          | 7.67      |                      |
| > 225,000                           | 18       | 25.72                          | 6.38      |                      |

*Footnotes:*<sup>a</sup>CHAOS, Confusion, Hubbub, and Order Scale (range: 15-60).<sup>b</sup>P-values were computed via the Spearman correlation test for continuous variables (i.e., child age), the Wilcoxon rank sum test with continuity correction for categorical variables with two levels (i.e., child race/ethnicity), the Kruskal-Wallis rank sum test for categorical variables with more than two levels (i.e., child sex), or the Jonckheere-Terpstra test for trend for ordinal variables with more than two levels (i.e., household income).

**Table S5.** Summary statistics and stability of household chaos, child appetitive traits, and BMI-z across time.

|                                  | Study A: Preschoolers |                   |                 |                   |                  | Study B: Preadolescents |                     |                |                     |                  |
|----------------------------------|-----------------------|-------------------|-----------------|-------------------|------------------|-------------------------|---------------------|----------------|---------------------|------------------|
|                                  | Baseline              |                   | Six-Month Visit |                   |                  | Baseline                |                     | One-Year Visit |                     |                  |
| Variable                         | N                     | Mean $\pm$ SD     | N               | Mean $\pm$ SD     | ICC <sup>e</sup> | N                       | Mean $\pm$ SD       | N              | Mean $\pm$ SD       | ICC <sup>e</sup> |
| CHAOS <sup>a</sup>               | 92                    | 28.2 $\pm$ 6.61   | 80              | 27.8 $\pm$ 6.59   | 0.93             | 184                     | 28.5 $\pm$ 7.08     | 95             | 28.4 $\pm$ 7.45     | 0.85             |
| Food responsiveness <sup>b</sup> | 92                    | 2.35 $\pm$ 0.69   | 80              | 2.38 $\pm$ 0.72   | 0.77             | 184                     | 2.58 $\pm$ 0.74     | 95             | 2.55 $\pm$ 0.80     | 0.74             |
| Emotional overeating             | 92                    | 1.56 $\pm$ 0.53   | 80              | 1.68 $\pm$ 0.57   | 0.61             | 184                     | 2.21 $\pm$ 0.66     | 95             | 2.31 $\pm$ 0.75     | 0.59             |
| Enjoyment of food                | 92                    | 3.70 $\pm$ 0.80   | 80              | 3.62 $\pm$ 0.68   | 0.76             | 184                     | 3.94 $\pm$ 0.59     | 95             | 3.89 $\pm$ 0.58     | 0.65             |
| Satiety responsiveness           | 92                    | 3.22 $\pm$ 0.71   | 80              | 3.19 $\pm$ 0.58   | 0.68             | 184                     | 2.76 $\pm$ 0.64     | 95             | 2.72 $\pm$ 0.60     | 0.71             |
| Emotional undereating            | 92                    | 2.54 $\pm$ 0.72   | 80              | 2.40 $\pm$ 0.88   | 0.56             | 184                     | 2.93 $\pm$ 0.72     | 95             | 2.89 $\pm$ 0.68     | 0.59             |
| EAH (calories) <sup>c</sup>      | 52                    | 79.17 $\pm$ 71.47 | 37              | 86.29 $\pm$ 53.17 | 0.63             | 184                     | 440.00 $\pm$ 222.06 | 94             | 509.16 $\pm$ 238.32 | 0.51             |
| BMI-z <sup>d</sup>               | 52                    | 0.40 $\pm$ 1.06   | NA              | NA                | NA               | 183                     | 0.48 $\pm$ 1.00     | 94             | 0.48 $\pm$ 1.01     | 0.94             |

Footnotes:

<sup>a</sup>CHAOS, Confusion, Hubbub, and Order Scale (range: 15-60).

<sup>b</sup>Appetitive traits (parent reported) were assessed via the Child Eating Behavior Questionnaire subscales (range: 1 to 5).

<sup>c</sup>EAH, eating in the absence of hunger was operationalized as the caloric intake during the EAH experiment.

<sup>d</sup>BMI-z, age- and sex-standardized body mass index z-score based on the CDC 2000 growth chart.

<sup>e</sup>ICC, intra-class correlation (two-way random-effect model).

**Table S6.** Associations between household chaos, child appetitive traits, and BMI-z.

| Outcome variable                | Study A: Preschoolers |                        |             |                         | Study B: Preadolescents |                        |           |              |
|---------------------------------|-----------------------|------------------------|-------------|-------------------------|-------------------------|------------------------|-----------|--------------|
|                                 | N                     | Number of observations | $\beta_s^a$ | 95% CI                  | N                       | Number of observations | $\beta_s$ | 95% CI       |
| Food responsiveness             | 92                    | 172                    | 0.10        | -0.07, 0.27             | 184                     | 279                    | 0.21      | 0.09, 0.32   |
| Emotional overeating            | 92                    | 172                    | 0.18        | 0.00, 0.35 <sup>b</sup> | 184                     | 279                    | 0.19      | 0.07, 0.31   |
| Enjoyment of food               | 92                    | 172                    | -0.02       | -0.20, 0.15             | 184                     | 279                    | 0.07      | -0.06, 0.20  |
| Satiety responsiveness          | 92                    | 172                    | 0.20        | 0.03, 0.37              | 184                     | 279                    | -0.14     | -0.25, -0.02 |
| Emotional undereating           | 92                    | 172                    | 0.08        | -0.09, 0.25             | 184                     | 279                    | 0.00      | -0.12, 0.13  |
| Eating in the absence of hunger | 70                    | 89                     | -0.03       | -0.25, 0.18             | 184                     | 278                    | 0.06      | -0.06, 0.18  |
| BMI-z <sup>c</sup>              | 52                    | 52                     | -0.02       | -0.31, 0.27             | 183                     | 277                    | 0.03      | -0.05, 0.12  |

*Footnotes:*

<sup>a</sup> $\beta_s$ : Standardized beta coefficients and 95% confidence intervals are presented in the table. Models were adjusted for child age, sex, and annual household income.

<sup>b</sup> $p = 0.044$ .

<sup>c</sup>BMI-z: age- and sex-adjusted body mass index z-scores.



**Table S7.** Sensitivity analysis: associations between household chaos, child appetitive traits, and BMI-z, further adjusting for family structure, nighttime sleep duration, and parenting style in preschoolers (Study A).

| Outcome variable                | Main model <sup>a</sup> |             |                         | Main model + number of children living in the household |           |             | Main model + nighttime sleep duration |           |             | Main model + parenting style |           |             |
|---------------------------------|-------------------------|-------------|-------------------------|---------------------------------------------------------|-----------|-------------|---------------------------------------|-----------|-------------|------------------------------|-----------|-------------|
|                                 | N                       | $\beta_s^b$ | 95% CI                  | N                                                       | $\beta_s$ | 95% CI      | N                                     | $\beta_s$ | 95% CI      | N                            | $\beta_s$ | 95% CI      |
| Food responsiveness             | 92                      | 0.10        | -0.07, 0.27             | 92                                                      | 0.08      | -0.11, 0.27 | 81                                    | 0.09      | -0.00, 0.39 | 92                           | 0.08      | -0.09, 0.26 |
| Emotional overeating            | 92                      | 0.18        | 0.00, 0.35 <sup>c</sup> | 92                                                      | 0.14      | -0.06, 0.34 | 81                                    | 0.18      | -0.02, 0.38 | 92                           | 0.15      | -0.03, 0.33 |
| Enjoyment of food               | 92                      | -0.02       | -0.20, 0.15             | 92                                                      | -0.01     | -0.20, 0.18 | 81                                    | 0.10      | -0.11, 0.30 | 92                           | -0.01     | -0.18, 0.17 |
| Satiety responsiveness          | 92                      | 0.20        | 0.03, 0.37              | 92                                                      | 0.24      | 0.05, 0.43  | 81                                    | 0.13      | -0.08, 0.33 | 92                           | 0.18      | 0.01, 0.35  |
| Emotional undereating           | 92                      | 0.08        | -0.09, 0.25             | 92                                                      | 0.10      | -0.10, 0.29 | 81                                    | 0.11      | -0.08, 0.31 | 92                           | 0.06      | -0.12, 0.23 |
| Eating in the absence of hunger | 70                      | -0.03       | -0.25, 0.18             | 70                                                      | -0.04     | -0.30, 0.22 | 65                                    | 0.04      | -0.19, 0.26 | 70                           | -0.06     | -0.28, 0.16 |
| BMI-z <sup>d</sup>              | 52                      | -0.02       | -0.31, 0.27             | 52                                                      | 0.02      | -0.37, 0.42 | 44                                    | 0.01      | -0.32, 0.34 | 52                           | -0.02     | -0.32, 0.27 |

Footnotes:

<sup>a</sup>The main models were adjusted for child age, sex, and annual household income.

<sup>b</sup>Standardized beta coefficients and 95% confidence intervals are presented in the table.

<sup>c</sup> $p = 0.044$ .

<sup>d</sup>BMI-z: age- and sex-adjusted body mass index z-scores.

**Table S8.** Sensitivity analysis: associations between household chaos, child appetitive traits, and BMI-z, further adjusting for parenting style and nighttime sleep duration in preadolescents (Study B).

|                                 | <i>Main model<sup>a</sup></i> |             |              | <i>Main model + parenting style</i> |           |              | <i>Main model +nighttime sleep duration</i> |           |              |
|---------------------------------|-------------------------------|-------------|--------------|-------------------------------------|-----------|--------------|---------------------------------------------|-----------|--------------|
| <b>Outcome variable</b>         | N                             | $\beta_s^b$ | 95% CI       | N                                   | $\beta_s$ | 95% CI       | N                                           | $\beta_s$ | 95% CI       |
| Food responsiveness             | 184                           | 0.21        | 0.09, 0.32   | 184                                 | 0.20      | 0.08, 0.32   | 157                                         | 0.22      | 0.10, 0.35   |
| Emotional overeating            | 184                           | 0.19        | 0.07, 0.31   | 184                                 | 0.18      | 0.05, 0.30   | 157                                         | 0.19      | 0.05, 0.32   |
| Enjoyment of food               | 184                           | 0.07        | -0.06, 0.20  | 184                                 | 0.08      | -0.05, 0.21  | 157                                         | 0.13      | -0.01, 0.26  |
| Satiety responsiveness          | 184                           | -0.14       | -0.25, -0.02 | 184                                 | -0.16     | -0.28, -0.04 | 157                                         | -0.16     | -0.29, -0.04 |
| Emotional undereating           | 184                           | 0.00        | -0.12, 0.13  | 184                                 | -0.02     | -0.15, 0.11  | 157                                         | -0.01     | -0.15, 0.13  |
| Eating in the absence of hunger | 184                           | 0.06        | -0.06, 0.18  | 184                                 | 0.07      | -0.05, 0.19  | 157                                         | 0.03      | -0.11, 0.16  |
| BMI-z <sup>c</sup>              | 183                           | 0.03        | -0.05, 0.12  | 183                                 | 0.04      | -0.05, 0.12  | 156                                         | 0.06      | -0.03, 0.15  |

*Footnotes:*

<sup>a</sup>Main models were adjusted for child age, sex, and annual household income.

<sup>b</sup>Standardized beta coefficients and 95% confidence intervals are presented in the table.

<sup>c</sup>BMI-z: age- and sex-adjusted body mass index z-scores.
